# DILI<sub>C</sub>: An AI based classifier to search for Drug-Induced Liver Injury literature

Sanjay Rathee<sup>1,†,\*</sup>, Meabh MacMahon<sup>1,2,†</sup>, Anika Liu<sup>1,3</sup>, Nicholas Katritsis<sup>1</sup>,  
Gehad Youssef<sup>1</sup>, Woochang Hwang<sup>1</sup>, Lilly Wollman<sup>1</sup>, Namshik Han<sup>1,4,\*</sup>

<sup>1</sup> *Milner Therapeutics Institute, University of Cambridge, Cambridge, UK*

<sup>2</sup> *LifeArc, Stevenage, UK*

<sup>3</sup> *Centre for Molecular Informatics, Department of Chemistry, University of Cambridge, UK*

<sup>4</sup> *Cambridge Centre for AI in Medicine, University of Cambridge, Cambridge, UK*

† *These authors contributed equally*

Correspondence\*:

Corresponding Author

nh417@cam.ac.uk, sr952@cam.ac.uk

## 2 ABSTRACT

3 Drug-Induced Liver Injury (DILI) is a class of Adverse Drug Reactions (ADR) which causes  
4 problems in both clinical and research settings. It is the most frequent cause of acute liver  
5 failure in the majority of western countries and is a major cause of attrition of novel drug  
6 candidates. Manual trawling of literature for is the main route of deriving information on DILI  
7 from research studies. This makes it an inefficient process prone to human error. Therefore,  
8 an automatized AI model capable of retrieving DILI-related papers from the huge ocean of  
9 literature could be invaluable for the drug discovery community. In this project, we built an artificial  
10 intelligence (AI) model combining the power of Natural Language Processing (NLP) and Machine  
11 Learning (ML) to address this problem. This model uses NLP to filter out meaningless text (e.g.  
12 stopwords) and uses customized functions to extract relevant keywords as singleton, pair, triplet  
13 and so on. These keywords are processed by apriori pattern mining algorithm to extract relevant  
14 patterns which are used to estimate initial weightings for a ML classifier. Along with pattern  
15 importance and frequency, an FDA-approved drug list mentioning DILI adds extra confidence  
16 in classification. The combined power of these methods build a DILI classifier (DILI<sub>C</sub>) with  
17 94.91% cross-validation and 94.14% external validation accuracy. To make DILI<sub>C</sub> as accessible  
18 as possible, including to researchers without coding experience, an R Shiny App capable of  
19 classifying single or multiple entries for DILI is developed to enhance ease of user experience and  
20 made available at <https://researchmind.co.uk/diliclassifier/>).

21 **Keywords:** DILI, Drug Induced Liver Injury, NLP, Natural language processing, ML, Machine learning, AI, Artificial Intelligence

## 1 INTRODUCTION

22 Drug-Induced Liver Injury (DILI) is a class of adverse drug reactions (ADR) which is an issue in both  
23 clinical and research settings. Although DILI can be mild, resolving once administration of the problem  
24 drug is discontinued, it lies on a spectrum and can also be severe. DILI is the most frequent cause of acute  
25 liver failure in the majority of western countries [Hoofnagle and Björnsson \(2019\)](#) and is a major cause of

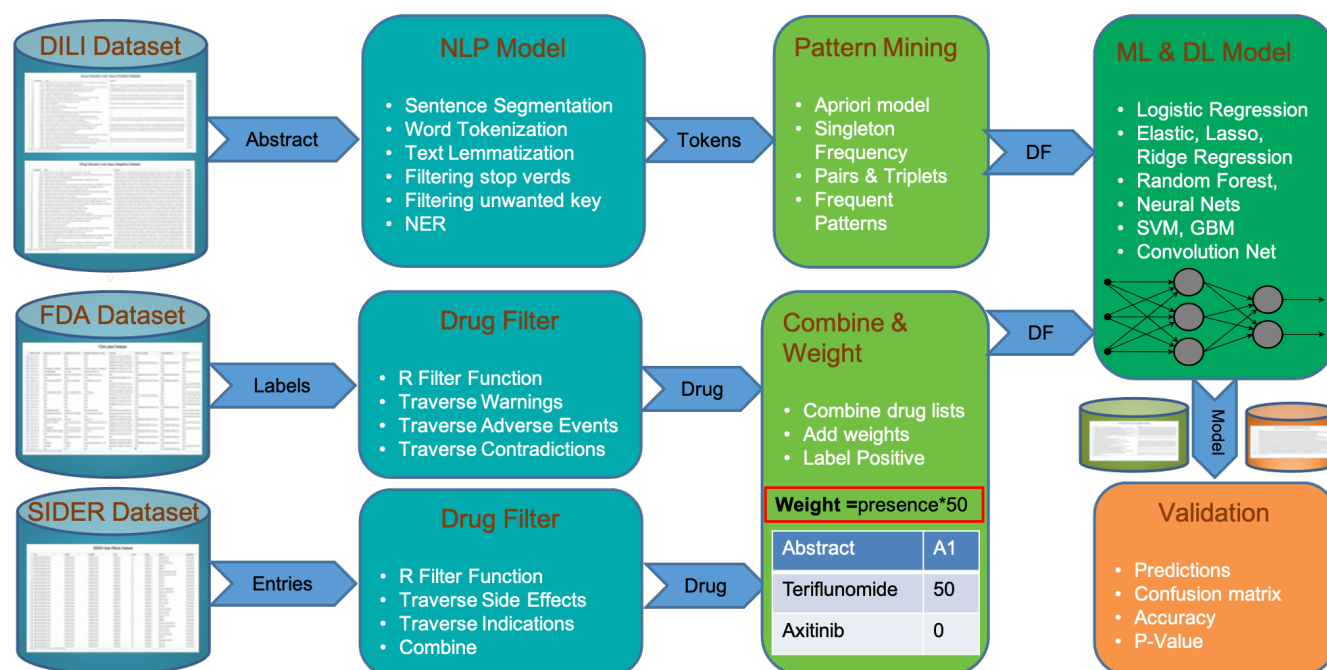

**Figure 1.** The steps of DILI<sub>C</sub> from dataset of DILI positive and DILI negative papers to validations showing intergration of FDA and SIDER datasets.

26 attrition of novel drug candidates Church and Watkins (2018) and accounts for almost one quarter of clinical  
27 drug failures Watkins (2011). As new findings on DILI are often published in scientific literature, collating  
28 this data from literature is useful for risk-assessment during drug development and in the clinic. However,  
29 currently manual trawling of text from literature is the main route of obtaining relevant information about  
30 DILI from research studies. This is an inefficient process prone to human error and modern computational  
31 techniques for mining textual data can improve it, a model capable of retrieving DILI-related papers from  
32 the huge ocean of literature could be invaluable for the drug discovery community.

33 Natural language processing (NLP) involves using computational techniques to extract information and  
34 insights from text data. Previous studies have applied NLP techniques to identify relevant literature for  
35 challenges in drug discovery, including with the goal of drug repurposing Zhu et al. (2020) and collating  
36 information on COVID-19 for researchers Wang and Lo (2021). Additionally previous attempts have been  
37 made to classify adverse drug events using NLP on available data Harpaz et al. (2014). Databases of drug  
38 side effects also contain DILI-related information FDA (2021); Kuhn et al. (2016). In this study NLP is  
39 used to extract relevant patterns from literature and this knowledge is combined with information related to  
40 DILI from publicly available databases. This combined information is used to train a classifier to classify  
41 literature as DILI-related or not. Figure 1 highlights the flow of text processing for our model.

## 2 MATERIALS AND METHODS

42 We built an artificial intelligence (AI) model combining the power of Natural Language Processing (NLP)  
43 and Machine Learning (ML) to extract relevant literature for DILI from ocean of published papers. This  
44 model combines the information available in the title and abstracts of scientific papers with information  
45 from external databases to improve the efficacy and accuracy. A detailed procedure is available in Algorithm  
46 1 which contains all the steps to build this model.

---

**Algorithm 1** Classify Literature as DILI Positive or DILI Negative

---

**Input:** Discovery dataframe having title, abstract and expert label for every article( $D_{DF}$ ), Validation dataframe having title, abstract only for every article( $V_{DF}$ )

**Output:** Validation dataframe having title, abstract and predicted label for every article( $V_{DF}$ )

```
1: procedure PREDICT-DILI-LABEL
2:    $P_{tokens} = \text{CharacterArray}()$  ▷ Store tokens for DILI positive articles
3:    $N_{tokens} = \text{CharacterArray}()$  ▷ Store tokens for DILI negative articles
4:    $ML_{matrix} = \text{Matrix}()$  ▷ Matrix for ML Model data
5:    $D_{DF}\$P_{tokens} = \text{CharacterArray}()$  ▷ Discovery cohort new column for positive token
6:    $D_{DF}\$N_{tokens} = \text{CharacterArray}()$  ▷ Discovery cohort new column for negative token
7:   for each article  $A \in D_{DF}$  do ▷ Loop to get token with NLP
8:      $\text{rowname}(ML_{matrix}) = A_{ID}$ 
9:     if  $A_{abstract} == \text{NA}$  then ▷ Use title as abstract if abstract missing
10:       $A_{abstract} = A_{title}$ 
11:     if  $A_{label} == \text{Positive}$  then ▷ For DILI positive abstract
12:       $A_{Pos\_tokens} = \text{Customized\_NLP\_Model}(A_{abstract})$ 
13:       $P_{tokens} = \text{c}(P_{tokens}, A_{Pos\_tokens})$ 
14:       $D_{DF}\$P_{tokens}[A] = A_{Pos\_tokens}$ 
15:     if  $A_{label} == \text{Negative}$  then ▷ For DILI negative abstract
16:       $A_{Neg\_tokens} = \text{Customized\_NLP\_Model}(A_{abstract})$ 
17:       $N_{tokens} = \text{c}(N_{tokens}, A_{Neg\_tokens})$ 
18:       $D_{DF}\$N_{tokens}[A] = A_{Neg\_tokens}$ 
19:    $\text{columns}(ML_{matrix}) = \text{unique}(P_{tokens}, N_{tokens})$  ▷ Add unique tokens as features in ML matrix
20:   for each token column  $T \in ML_{matrix}$  do ▷ Loop to calculate weight for each token  $W_T$ 
21:      $\alpha = \text{Pos}_{Freq}[T] / (\text{Pos}_{Freq}[T] + \text{Pos}_{Freq}[T])$  ▷ Frequency weight for each token
22:      $\beta = \text{Apriori\_Score}[T]$  ▷ Presence/Absence as frequent singleton, pair, triplet and so on.
23:      $\gamma = \text{FDA\_Score}[T]$  ▷ Presence/Absence in FDA drug list with DILI Adverse Event
24:      $\lambda = \text{SIDER\_Score}[T]$  ▷ Presence/Absence in SIDER drug list with DILI Adverse Event
25:      $W_T = \alpha + \beta + \gamma + \lambda$ 
26:   Train\_ML\_Model $[ML_{matrix}]$ 
```

---

## 47 2.1 Data Preparation

48 A well curated dataset of ~28,000 DILI annotated papers was obtained from the CAMDA team CAMDA  
49 (2021). This dataset was generated after filtering out the most obvious DILI literature which makes the  
50 task of classification challenging, but more representative of the challenge of sorting through real word  
51 literature beyond the obviously DILI related or entirely unrelated papers. All the papers in this dataset are  
52 labeled as DILI related (DILI positives) or not related to DILI (DILI negatives) by an experienced panel  
53 of experts. We used approximately half of this data with a balanced split of DILI positive and negative to  
54 extract insights and train a model (discovery set). The remaining half was kept as validation set.

55 We divided the discovery set of 14,203 papers into training (80%) and testing (20%) sets consistent with  
56 their labels. Overall, we used 5,741 DILI positive & 5,620 DILI negative as a training set and 1,436 DILI  
57 positive & 1,406 DILI negative as test set.

## 58 2.2 Natural Language Processing Model

59 A NLP model with some customization was used to extract the relevant information from the available  
60 training cohort (Algorithm 2). It starts with the most basic NLP step sentence tokenization on titles and  
61 abstracts, followed by word tokenization. A customized word tokenization method was developed to  
62 generate keyword sets of singleton, pairs, triplets and so on. This step generates combinations containing

63 only nouns and adjectives and filters out irrelevant text like stop words using R UDPipe package. These  
64 keyword sets were processed for text lemmatization and stemming to generalise the list. The output of this  
65 NLP model was a vector containing all keyword sets as features and for each of these their frequency and  
66 length (singleton, pair) was stored as weights for pattern mining. This NLP model was applied on both title  
67 and abstracts.

---

**Algorithm 2** Customized NLP Model to extract Tokens from Abstract

---

**Input:** Abstract for an Article ( $A_{abstract}$ )

**Output:** Tokens of length 1,2,3,and so on.

```
1: procedure CUSTOMIZED_NLP_MODEL
2:   for each article  $A \in D_{DF}$  do                                     ▷ Loop to get token with NLP
3:      $df = \text{Sentence\_Segmentation}[A_{abstract}]$  ▷ UDPipe split paragraph with end pattern(i.e. colon)
4:      $df = \text{Word\_Tokenization}[df]$                                ▷ UDPipe split sentence with pattern like space,tab
5:      $df = \text{Word\_Lemmatization}[df]$                                ▷ UDPipe change words with lemma term
6:      $df = \text{Word\_Filter}[df]$                                      ▷ UDPipe keep only noun, adjective, verb
7:      $df = \text{Customized\_Token\_Generator}[df]$  ▷ Yield continuous tokens as pair, triplet and so on
8:     Yield( $df$ $tokens)
9:   Collect(tokens)
```

---

## 68 2.3 Pattern Mining

69 Along with the total frequency of a keyword set, the frequency of the keyword and its subsets in terms  
70 of the number of papers (DILI positive or DILI negative) in which it appears was calculated. The pattern  
71 mining ML algorithm Apriori was used for this. In this way, we included the frequency of a keyword set  
72 and its subset as a factor for weighting that keyword set. A distributed processing-based implementation of  
73 Apriori was used to minimize the overall processing time.

## 74 2.4 External Cohort Integration

75 Since external datasets contain information which could be advantageous in classifying DILI literature,  
76 two were integrated into the model. These two publically available datasets were the FDA approved drugs  
77 list FDA (2021) and SIDER adverse events dataset Kuhn et al. (2016). From these two datasets (Algorithm  
78 3), a list of drugs with DILI as adverse events or warning were extracted, and these drugs were given a  
79 higher weight than others without such warnings. The side effects field of SIDER database for drugs was  
80 helpful to add extra information into this highly weighted list.

## 81 2.5 Classifier

82 The final vector of keywords along with their updated weights was given as an input to various well-  
83 known ML & AI models (Logistic Regression, Elastic Net, Random Forest, Neural Net, Support Vector  
84 Machine, Gradient Boosting Machine, Convolution Neural Networks and LSTM) to train a classifier. The  
85 weight of a keyword was calculated by its total frequency, length, FDA and SIDER list presence or absence.

$$W_T = \sum_{i=1}^j W_{f_i} * Key_i + \sum_{i=1}^j W_{l_i} * Key_i + \sum_{i=1}^j W_{f_{dai}} * Key_i + \sum_{i=1}^j W_{sider_i} * Key_i \quad (1)$$

86 In equation (1),  $W_T$  represents the total weight for a paper,  $key$  represents the weight for presence(1) or  
87 absence(0) of a keyword set, ( $W_f$ ) represents the weight for frequency of a keyword set,  $W_l$  represents

**Algorithm 3** Add score for presence/absence in external cohort FDA and SIDER

**Input:** Array of Tokens ( $T$ ), FDA drug list ( $FDA$ ), SIDER drug list ( $SIDER$ )  
**Output:** FDA and SIDER score for each Token  $T_i$

```

1: procedure FDA_SCORE
2:    $FDA\_DILI\_Drug\_List = \text{CharArray}()$ 
3:   for each drug  $D \in FDA$  do                                     ▷ Loop to get token score in FDA cohort
4:     if  $DILI \in D_{AdverseEvent}$  then                             ▷ Check Drug Adverse Event contain DILI
5:        $FDA\_DILI\_Drug\_List = D_{name}$ 
6:   for each Token  $t \in T$  do                                     ▷ Loop to get token score in FDA cohort
7:     if  $t \in FDA\_DILI\_Drug\_List$  then                             ▷ Check token present in FDA DILI drug list
8:        $t_{FDAscore} = s$                                            ▷ Allocate constant score s to token
9:     else
10:       $t_{FDAscore} = 0$                                            ▷ Allocate zero score to token
11:    $\text{Collect}(T)$ 
12: procedure SIDER_SCORE
13:    $SIDER\_DILI\_Drug\_List = \text{CharArray}()$ 
14:   for each drug  $D \in SIDER$  do                                 ▷ Loop to get token score in SIDER cohort
15:     if  $DILI \in D_{AdverseEvent}$  then                             ▷ Check Drug Adverse Event contain DILI
16:        $SIDER\_DILI\_Drug\_List = D_{name}$ 
17:   for each Token  $t \in T$  do                                     ▷ Loop to get token score in SIDER cohort
18:     if  $t \in SIDER\_DILI\_Drug\_List$  then                             ▷ Check token present in SIDER DILI drug list
19:        $t_{SIDERscore} = s$                                            ▷ Allocate constant score s to token
20:     else
21:       $t_{SIDERscore} = 0$                                            ▷ Allocate zero score to token
22:    $\text{Collect}(T)$ 

```

88 the weight for length of a keyword set (for instance singleton 1, pair 2, triplet 3),  $W_{fda}$  represents the  
89 weight for presence and absence in FDA list with DILI adverse event and  $W_{sider}$  represents the weight for  
presence and absence in SIDER list with DILI adverse event. The classifier with the highest cross-validation

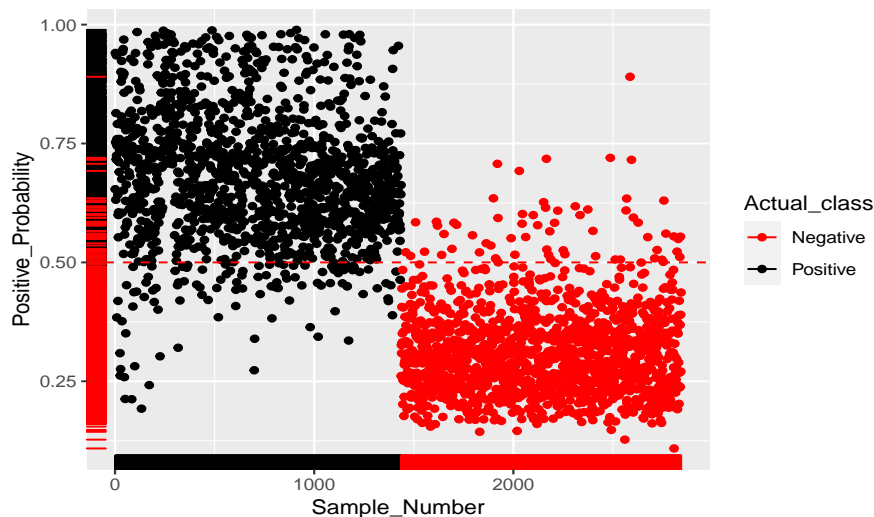

**Figure 2.** Prediction Probabilities Plot.

90 accuracy (Gradient Boosting Machines) was tested on a put-aside test set. The results on the test set were  
91 quite promising with an accuracy of 94.89%. The model was iterated 10 times with different test set to get  
92

93 the average accuracy of 94.9%. Figure 2 shows the probability of every sample being positive. Any sample  
94 with a probability higher than 50% is labelled as DILI positive. The cutoff of 50% can be adjusted to closer  
95 reflect a real-world dataset which will have far more negative literature. Table 1 shows the confusion matrix  
for the stand-out (20%) testing set.

|                 |          | True class |          |
|-----------------|----------|------------|----------|
|                 |          | Positive   | Negative |
| Predicted class | Positive | 1335       | 44       |
|                 | Negative | 101        | 1362     |

**Table 1.** Confusion matrix of GBM classifier applied to stand out abstract cohort

96

### 3 RESULTS

97 The most effective model was Gradient Boosting Machines ( Figure 3) with 94.76% accuracy when applied  
98 to the internal hold out test set of 2,842 papers, half of which were DILI positive and half DILI negative.  
99 The inclusion of FDA and SIDER datasets improved the accuracy of the GBM model in the validation set  
100 and on an additional external set (Table 2). The final model is used to predict the labels for the external  
101 validation cohort shared by CAMDA. We got encouraging results with an accuracy of 94.14% and F1-Score  
94.08%. The highlight of the model was its recall value of 96.02%. Dili<sub>C</sub> was then applied to an unseen

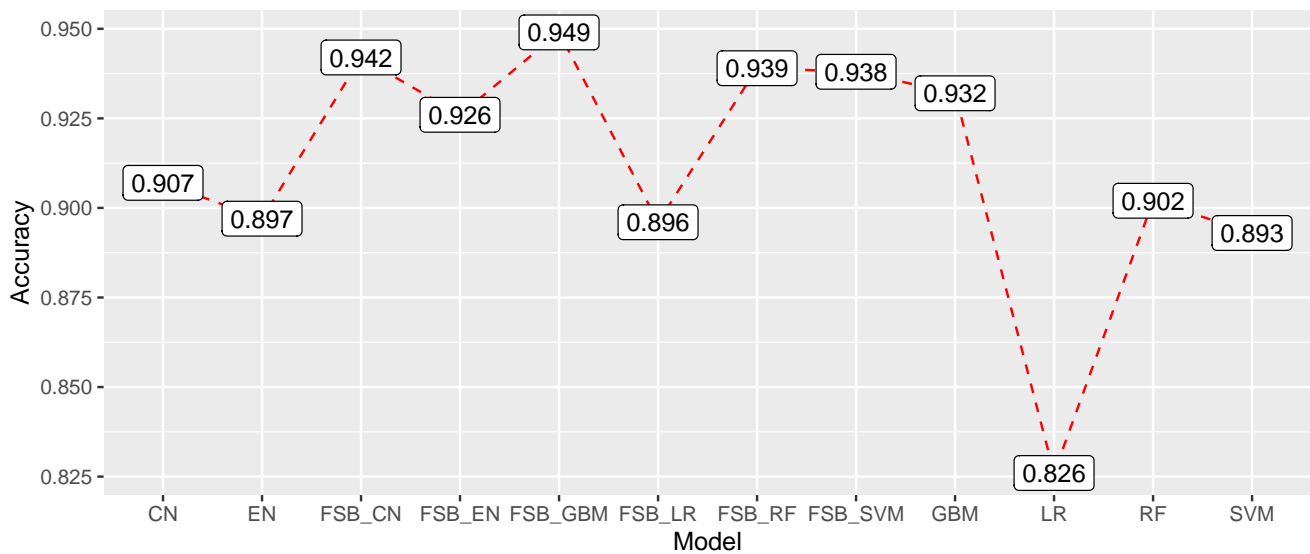

**Figure 3.** Internal accuracies for all ML classifiers (EN: Elastic Net, LR: Logistic Regression, SVM: Support Vector Machines, CN: Convolution Network, RF: Random Forest, GBM: Gradient Boosting Machines, FSB: Feature Selection Based Model) showing that GBM has the highest accuracy.

102

103 additional external set which was unbalanced DILI cohort, making it more reflective of real world data. On  
104 the additional external set accuracy was 90.25% and an F1-score of 90.94%. The recall value was improved  
105 with this set, with a vaule of 97.9%

## 4 DISCUSSION

106 DILI<sub>C</sub> is a model with high accuracy which is useful to the community to classify literature as related to or  
107 unrelated to DILI, which can help do DILI risk-assessment for drugs during development, repurposing or in  
108 the clinic. Although it was developed to classify DILI literature, it has been designed to handle any adverse  
109 event classification problem so it's has applications for drug risk-assessment beyond just liver injury to  
110 toxicities in other tissues. We note that complex machine learning AI models are known to have the power  
to magnify weak signals . In order to minimise the pressure on ML models and reduce the risk of such

|                     | Validation Set (14211) |          |        |           | Additional external set (2000) |          |        |           |
|---------------------|------------------------|----------|--------|-----------|--------------------------------|----------|--------|-----------|
|                     | Accuracy               | F1 score | Recall | Precision | Accuracy                       | F1 score | Recall | Precision |
| GBM (abstract only) | 0.9386                 | 0.9376   | 0.9631 | 0.9133    | 0.8845                         | 0.8936   | 0.9700 | 0.8284    |
| GBM(+FDA)           | 0.9406                 | 0.9396   | 0.9659 | 0.9147    | 0.8915                         | 0.8992   | 0.9680 | 0.8395    |
| GBM (+SIDER)        | 0.9414                 | 0.9408   | 0.9602 | 0.9221    | 0.9025                         | 0.9094   | 0.9790 | 0.8491    |

**Table 2.** Results for the GBM model applied to the validation set and additional external set of DILI and non-DILI literature. The inclusion of FDA and SIDER datasets improved the GBM model

111  
112 erroneous magnification, during the development of DILI<sub>C</sub> a strong focus was put on the data cleaning  
113 processing steps of the model. Another potential issue is the chance that the inclusion of SIDER dataset  
114 could introduce bias against publications relating to drugs which aren't yet included therein. Reassuringly,  
115 even without the inclusion of this database, DILI<sub>C</sub> performs well, with an accuracy of 94.06% on the  
116 Validation set and of 89.15% on the additional external set. There is still potential to improve DILI<sub>C</sub> in the  
117 future. Later steps like customized word segmentation, pattern mining, and external relevant cohorts add  
118 power to DILI<sub>C</sub> and there is still plenty of scope to adjust the weights for these steps. In addition, as other  
119 databases related to drug toxicity and side effects are developed, these could be integrated to improve the  
120 model. To make DILI<sub>C</sub> as accessible as possible, including to researchers without coding experience, an R  
121 Shiny App capable of classifying single or multiple abstracts for DILI is developed to enhance ease of user  
122 experience and made available at <https://researchmind.co.uk/diliclassifier/>).

## 5 CONCLUSIONS

123 DILI<sub>C</sub> is a novel tool to classify literature as related to DILI or not. This is significant as it has the potential  
124 to aid researchers in drug-development and research settings during risk-assessment.

125 DILI<sub>C</sub> is implemented in such a way that it can be modified to classify any other drug adverse reaction  
126 like DILI. Therefore, DILI<sub>C</sub> code available at GitHub could be useful for researchers working in the same  
127 domain. A shiny app for DILI<sub>C</sub> makes it user-friendly.

## CONFLICT OF INTEREST STATEMENT

128 SR is funded by JW Pharmaceutical. MM is an employee of LifeArc. NH and WH are funded by LifeArc.  
129 AL is funded by GlaxoSmithKline. NH is a cofounder of KURE.ai and CardiaTec Biosciences and an  
130 advisor at Biorelate, Promatix, Standigm and VeraVerse.

## AUTHOR CONTRIBUTIONS

131 SR, MM and NH conceived and designed the analysis; SR and MM collected the data, built the model,  
132 performed the analysis and wrote the paper; AL, NK, GY, WH and LW contributed data or analysis tools;  
133 AL and NH reviewed the paper; NH supervised the project.

## FUNDING

134 SR is funded by JW Pharmaceutical, MM and WH are funded by LifeArc, AL is funded by  
135 GlaxoSmithKline, NK is funded by Cambridge Trust

## ACKNOWLEDGMENTS

136 The authors thank CAMDA for provision of curated DILI datasets for training and testing.

## DATA AVAILABILITY STATEMENT

137 The code datasets analysed for this study can be found in the DILI Github. [[https://github.com/  
138 sanjaysinghrathi/DILI-Classifier](https://github.com/sanjaysinghrathi/DILI-Classifier)].

## REFERENCES

- 139 [Dataset] CAMDA (2021). CAMDA 2021  
140 Church, R. J. and Watkins, P. B. (2018). In silico modeling to optimize interpretation of liver  
141 safety biomarkers in clinical trials. *Experimental Biology and Medicine* 243, 300–307. doi:10.1177/  
142 1535370217740853. Publisher: SAGE Publications  
143 [Dataset] FDA (2021). Drugs@FDA: FDA-Approved Drugs  
144 Harpaz, R., Callahan, A., Tamang, S., Low, Y., Odgers, D., Finlayson, S., et al. (2014). Text Mining  
145 for Adverse Drug Events: the Promise, Challenges, and State of the Art. *Drug Safety* 37, 777–790.  
146 doi:10.1007/s40264-014-0218-z  
147 Hoofnagle, J. H. and Björnsson, E. S. (2019). Drug-Induced Liver Injury — Types and Phenotypes. *New  
148 England Journal of Medicine* 381, 264–273. doi:10.1056/NEJMra1816149. Publisher: Massachusetts  
149 Medical Society .eprint: <https://doi.org/10.1056/NEJMra1816149>  
150 Kuhn, M., Letunic, I., Jensen, L. J., and Bork, P. (2016). The SIDER database of drugs and side effects.  
151 *Nucleic Acids Research* 44, D1075–D1079. doi:10.1093/nar/gkv1075  
152 Wang, L. L. and Lo, K. (2021). Text mining approaches for dealing with the rapidly expanding literature  
153 on COVID-19. *Briefings in Bioinformatics* 22, 781–799. doi:10.1093/bib/bbaa296  
154 Watkins, P. (2011). Drug Safety Sciences and the Bottleneck in Drug Development.  
155 *Clinical Pharmacology & Therapeutics* 89, 788–790. doi:10.1038/clpt.2011.63. .eprint:  
156 <https://onlinelibrary.wiley.com/doi/pdf/10.1038/clpt.2011.63>  
157 Zhu, Y., Jung, W., Wang, F., and Che, C. (2020). Drug repurposing against Parkinson’s disease by  
158 text mining the scientific literature. *Library Hi Tech* 38, 741–750. doi:10.1108/LHT-08-2019-0170.  
159 Publisher: Emerald Publishing Limited
